# Supplementary material
Source: PubMed Central journal article supplement (PMC6922050)
Supplement: NIHMS1060108-supplement-Appendix_I__Appendix_II__and_appendix_III.pdf [file NIHMS1060108-supplement-Appendix_I__Appendix_II__and_appendix_III.pdf]

## 1 **Appendix I: Inclusion Criteria, Evidence Acquisition, Methods**

### 2 **Inclusion/Exclusion Criteria**

3 To be included in this review, a study must be conducted in a high-income economy

4 (([http://econ.worldbank.org/WBSITE/EXTERNAL/DATASTATISTICS/0,,contentMDK:20421402~me](http://econ.worldbank.org/WBSITE/EXTERNAL/DATASTATISTICS/0,,contentMDK:20421402~menuPK:64133156~pagePK:64133150~piPK:64133175~theSitePK:239419,00.html#High_income)  
5 [nuPK:64133156~pagePK:64133150~piPK:64133175~theSitePK:239419,00.html#High\\_income](http://econ.worldbank.org/WBSITE/EXTERNAL/DATASTATISTICS/0,,contentMDK:20421402~menuPK:64133156~pagePK:64133150~piPK:64133175~theSitePK:239419,00.html#High_income)));

6 published in English in a journal or government report; evaluate the effect of year-round schooling on an  
7 outcome of interest: academic achievement, cognition, social or emotional skills, or delinquent  
8 behaviors; and have a concurrent comparison group or before-after comparison;. Studies were excluded  
9 if they assessed an exclusively special needs population.

### 10 **Evidence Acquisition**

11 Detailed systematic review methods used for the Community Guide have been published.(22) For  
12 detailed search information see ([https://www.thecommunityguide.org/findings/health-equity-year-round-](https://www.thecommunityguide.org/findings/health-equity-year-round-schooling)  
13 [schooling](https://www.thecommunityguide.org/findings/health-equity-year-round-schooling)).

14

### 15 **Assessing and Summarizing the Body of Evidence of Effectiveness**

16 **Study Abstraction and Quality Assessment.** Information on study methods, results, and interpretation  
17 was abstracted following standard Community Guide criteria.(23)

18

19 **Primary outcomes of interest.** Education achievement was collected as a primary outcome measured  
20 by changes in standardized achievement test scores. No studies reported on social, emotional, cognition,  
21 or behavioral outcomes.

22

23 **Analysis and synthesis of results.** When metrics allowed, effect estimates from individual studies were  
24 pooled to calculate a median. Otherwise, effect estimates were calculated using relative percent change

25 or absolute percentage point change. When at least five independent effect estimates were available,  
 26 interquartile intervals (IQIs) were calculated to measure variation; otherwise, the range of estimates was  
 27 indicated. Studies without metrics or data to allow direct comparison with other studies were narratively  
 28 summarized. Analyses were conducted in 2016–2017.

29

30 **Search strategy.** The Community Preventive Services Task Force finding is based on evidence from a  
 31 systematic review published in 2003 (Cooper et al., search period through March 2002) and a  
 32 Community Guide update (search period March 2002–August 2016). To update the search, the review  
 33 team used the search strategy listed below.

34

35 The following databases were searched for English-language papers that evaluated the impact of  
 36 modified school time programs:

37

- 38 • ERIC
- 39 • PsycINFO

40

41 The literature search covered interventions modifying school time by rearranging school calendar to  
 42 create year-round schooling without expanding school time. Community Guide staff limited the search  
 43 to databases used by Cooper et al (except for Dissertation Abstracts, which was excluded because we  
 44 did not include dissertations in the update).

45

46 Following are the search strategies used for this review.

47

48

49 Database: ERIC (PROQUEST)

50 Date Searched: 8/4/2016

51

52 Limits applied – after March 2002, English only, exclude dissertations/theses

53

- 54 • S15
- 55 1 OR 2 OR 3 OR 4 OR 5 OR 6 OR 7 OR 8 OR 9 OR 10 OR 11 OR 12 OR 13 OR 14
- 56 • S14
- 57 “lengthening the school year”
- 58 • S13
- 59 “lengthen the school year”
- 60 • S12
- 61 “lengthened school year”
- 62 • S11
- 63 “longer school year”
- 64 • S10
- 65 “extended school year”
- 66 • S9
- 67 “extended school calendar”

- 68 • S8
- 69 "year round education" OR "year-round education"
- 70 • S7
- 71 "modified school calendar"
- 72 • S6
- 73 "alternative calendar" OR "alternative calendars" OR "alternative school calendar" OR
- 74 "alternative school calendars"
- 75 • S5
- 76 "year round school"
- 77 • S4
- 78 "twelve month calendar"
- 79 • S3
- 80 "extended school year"
- 81 • S2
- 82 SUBJECT.exact("Year Round Schools")
- 83 • S1
- 84 "12 month school" OR "twelve month school"
- 85
- 86

87 Database: PsycINFO (OVID)

88 Date Searched: 8/4/2016

- 89
- 90 • 1
- 91 (alternative calendar or modified school calendar or year-round school).mp.
- 92 • 2
- 93 (year-round education or 12 month school or twelve month school or extended school
- 94 calendar\*).mp.
- 95 • 3
- 96 (longer school year or extended school year or lengthened school year or lengthen the school
- 97 year).mp.
- 98 • 4
- 99 (lengthening the school year or alternative school calendar).mp.
- 100 • 5
- 101 (lengthening school year or lengthen\* the school year or alternative school calendar\*).mp.
- 102 • 6
- 103 (200204\* or 200205\* or 200206\* or 200207\* or 200208\* or 200209\* or 20021\*).up.
- 104 • 7
- 105 (2003\* or 2004\* or 2005\* or 2006\* or 2007\* or 2008\* or 2009\* or 2010\* or 2011\* or 2012\* or
- 106 2013\* or 2014\* or 2015\* or 2016\*).up.
- 107 • 8
- 108 6 or 7
- 109 • 9
- 110 or/1-5
- 111 • 10
- 112 8 and 9
- 113

## 115 **Appendix II: Evidence Synthesis**

### 116 **Search Yield**

117 Search results are shown in Figure 2/Appendix. The meta-analysis (Cooper 2003) included 47 studies of  
118 39 school districts. Six studies (15-19, 21, 24) from the update search were included, for a total of 53  
119 studies in the current review. One study (24) did not distinguish effects of single- and multi-track  
120 programs and was excluded. Detailed summary of the included studies is available at  
121 [<https://www.thecommunityguide.org/sites/default/files/assets/SET-year-round-school.pdf>].

122

123 Results are presented separately for single- and multi-track systems. Cooper and colleagues distinguish  
124 effects of single- and multiple-track programs, but do not stratify the remainder of meta-analytic results  
125 separately by track format.

126

### 127 **Study and Intervention Characteristics**

128 In the Cooper and colleagues review, all included studies came from the U.S., and most studies were  
129 cross-sectional or before-after with concurrent comparison group Table 2/Appendix. Studies reported  
130 interventions in urban school districts (n=18), elementary schools (n=23), and single-track schools  
131 (n=15). Intersession was mentioned in 15 studies without specifying program format. Cooper and  
132 colleagues graded the strength of evidence on YRSCs as weak.

133

134 Studies in the update included prospective cohort, panel, and cross-sectional designs. The most common  
135 quality of execution limitation was inadequate description of the intervention. Two interventions were  
136 in mixed urban/suburban and rural settings.(16, 25) Two studies reported on multi-track schools (19,  
137 21), one on multi-track and single-track schools(15), and two on single-track schools.(16, 18) Half were  
138 in elementary or middle schools.(18, 19, 21)

139

140 Only one study (16) from the update search mentioned intersession--a study of single-track YRSCs in  
141 Virginia, reporting that all schools offered intersession classes 4 hours/day and that a median of 80% of  
142 students attended. Intersessions were often mandatory for students who were having difficulty with  
143 school, but were optional for students who wanted to expand their knowledge.

144

### 145 **Population Characteristics**

146 The Cooper review did not report on population characteristics. Four studies from the update (15, 18,  
147 19, 21) reported on gender and found similar proportions of female (median 47.9%) and male students.  
148 Three studies (15, 19, 21) reported populations were mostly white (median 43%) or Hispanic (median  
149 39.5%). The distribution of the black population (15, 19, 21) (median 8.2%) was slightly lower than the  
150 US population, while the Asian population (15, 19) (median 6.3%) was similar to the U.S. population.  
151 The median proportion of students eligible for free or reduced-price lunch was 33.6% (18, 21). Study  
152 and intervention characteristics are in Appendix Table 2.

153

154 **Appendix III: Limitations**

155 The definition of an intervention is key, both for evaluation of its effectiveness and for potential  
156 implementation. In the case of year-round school calendars, common definitions note that while school  
157 breaks are rearranged in the school year, there is no net change in the amount of schooling provided.  
158 However, at least in the case of single-track schools in Virginia, all schools provided intersessions  
159 attended by large proportions of students, so that there was in fact a substantial addition of school time  
160 for these students, particularly for students attending for remedial work for whom intersession  
161 attendance was often required. Yet most of the studies reviewed by Cooper and colleagues, did not  
162 mention the presence of intersession, so we were not able to investigate this issue.

163

164 Additionally, interpretation of review findings is limited by the lack of information on other changes  
165 made in schools. For example, included studies did not indicate how teaching practices changed (did  
166 they continue with current teaching practices or modify their practices). It is critical that we understand  
167 which alternative they choose so that we can make stronger conclusions on the effectiveness of these  
168 interventions.

169

170

171 **Appendix Figure 2: Search Process and Yield**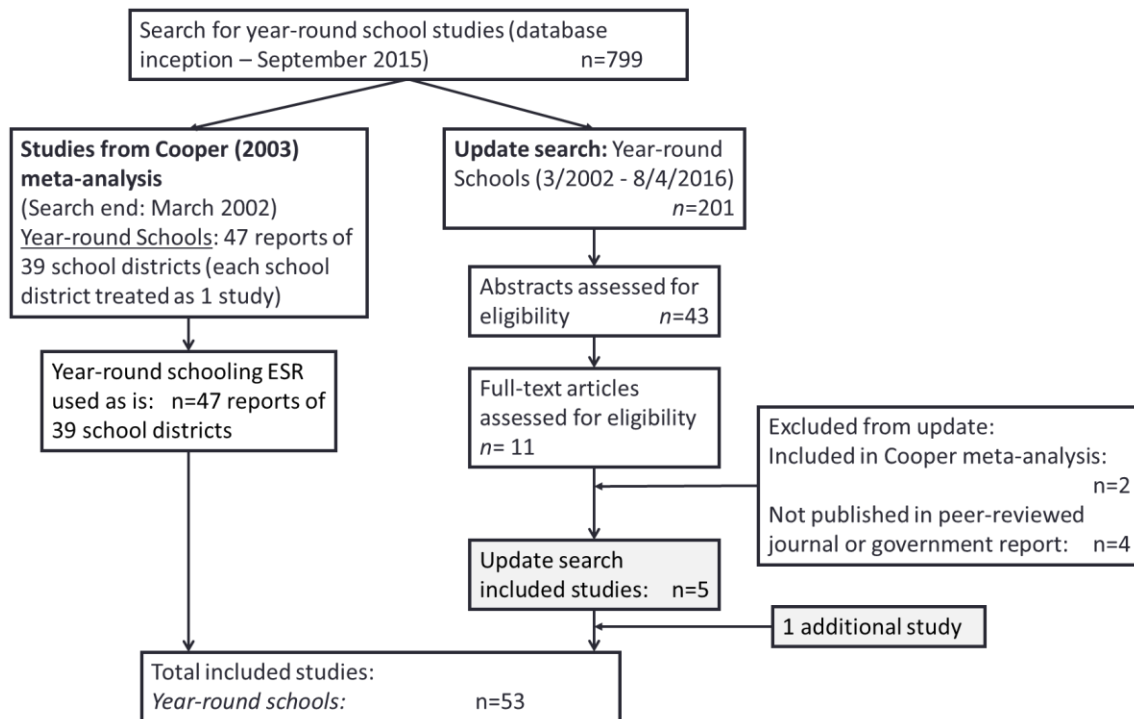

172

173

174

175 **Appendix Table 1: Study and Intervention Characteristics in Included Studies**

| Characteristic     |                           | Cooper 2003<br># of studies reporting (%) | Update<br># of studies reporting (%) |
|--------------------|---------------------------|-------------------------------------------|--------------------------------------|
| Country            | U.S.                      | 47 (100%)                                 | 5 (100%)(16, 18-20, 24)              |
| Setting            | Traditional public school | NR*                                       | 4 (80%)(15, 16, 19, 20)              |
|                    | NR                        | 47 (100%)                                 | 1 (20%)(18)                          |
| Population Density | Urban                     | 18 (38.3%)                                | NR                                   |
|                    | Suburban                  | 6 (12.8%)                                 | NR                                   |
|                    | Rural                     | 5 (10.6%)                                 | NR                                   |
|                    | Mixed (urban to rural)    | NR                                        | 3 (60%)(15, 16, 20)                  |
| School Level       | Kindergarten/Elementary   | 18 (38.3%)                                | 2 (40%)(18, 20)                      |
|                    | Elementary and Middle     | 6 (12.8%)                                 | 1 (20%)(19)                          |

|                               |                              |            |                        |
|-------------------------------|------------------------------|------------|------------------------|
|                               | Middle                       | 5 (10.6%)  | 0                      |
|                               | High                         | NR         | 0                      |
|                               | Elementary, Middle, and High | 18 (38.3%) | 1 (20%) (15)           |
| Type of Year-Round Calendar   | Single-track                 | 15 (31.9%) | 3 (60.0%)(15, 16, 18)  |
|                               | Multi-track                  | 8 (17.0%)  | 3 (60.0%) (15, 19, 20) |
|                               | Both                         | NR         | 1 (33.3%) (15)         |
| Participation in Intersession | Mentioned                    | 15 (31.9%) | 1 (20%) (16)           |
|                               | Not mentioned                | 24 (51.1%) | 4(83.3%) (15, 18-20)   |

176 \*NR = not reported

177 **Appendix Table 2: Effects of Year-Round Schools: Cooper 2003, Achievement Scores**

| Variable                        |                             | # of Studies | Weighted d-Index (95% CI)* |
|---------------------------------|-----------------------------|--------------|----------------------------|
| <b>Overall Summary Estimate</b> |                             | <b>39**</b>  | <b>0.06 (0.04 to 0.08)</b> |
| Track system                    | Single-track                | 15           | 0.19 (0.07 to 0.31)        |
|                                 | Multi-track                 | 8            | 0.04 (-0.12 to 0.2)        |
| SES                             | Low                         | 18           | 0.19 (0.08 to 0.30)        |
|                                 | Moderate, middle, and mixed | 25           | 0.05 (-0.04 to 0.14)       |
| Grade level                     | Elementary                  | 23           | 0.10 ( 0.01 to 0.19)       |
|                                 | Secondary                   | 9            | 0 (-0.14 to .14)           |
| % white                         | <2/3 of sample              | 16           | 0.10 ( -0.02 to 0.22)      |
|                                 | >2/3 of sample              | 14           | 0 (-0.13 to .13)           |
| # years in operation            | 1                           | 8            | 0.03 (-0.13 to .19)        |
|                                 | >1                          | 17           | 0.10 (0 to 0.20)           |



|                     |                                         |    |                       |
|---------------------|-----------------------------------------|----|-----------------------|
| Intersession        | Mentioned                               | 15 | .10 (-0.01 to .21)    |
|                     | Not mentioned                           | 24 | .08 (-0.01 to .17)    |
| City size           | Large urban                             | 12 | 0.07 (-0.06 to 0.20)  |
|                     | Small urban                             | 6  | -0.03 (-0.21 to 0.15) |
|                     | Suburban                                | 6  | 0.13 (-0.06 to 0.32)  |
|                     | Rural                                   | 5  | 0.04 ( -0.19 to 0.27) |
| Publication type    | Dissertations and theses                | 26 | 0.09 (0 to 0.18)      |
|                     | All other                               | 18 | 0.12 (0.02 to 0.22)   |
| Outcome measurement | Standardized achievement tests          | 34 | 0.08 ( 0 to 0.16)     |
|                     | Other (effect estimate based on grades) | 8  | 0.09 (-0.06 to .24)   |

178 \*Adjusted for study methodological differences; random error model; \*\* reports of schools from the  
 179 same school district were combined for one effect estimate

180

181

182

183

184
