# Supplementary material
Source: PubMed Central journal article supplement (PMC6922050)
Supplement: NIHMS1060108-supplement-Appendix_Table_2.pdf [file NIHMS1060108-supplement-Appendix_Table_2.pdf]

Table 2. Study and Intervention Characteristics in Included Studies

| <b>Characteristic</b>         |                              | <b>Cooper 2003<br/># of studies reporting<br/>(%)</b> | <b>Update<br/># of studies reporting<br/>(%)</b> |
|-------------------------------|------------------------------|-------------------------------------------------------|--------------------------------------------------|
| Country                       | U.S.                         | 47 (100%)                                             | 5 (100%)(16, 18-20, 24)                          |
| Setting                       | Traditional public school    | NR*                                                   | 4 (80%)(15, 16, 19, 20)                          |
|                               | NR                           | 47 (100%)                                             | 1 (20%)(18)                                      |
| Population Density            | Urban                        | 18 (38.3%)                                            | NR                                               |
|                               | Suburban                     | 6 (12.8%)                                             | NR                                               |
|                               | Rural                        | 5 (10.6%)                                             | NR                                               |
|                               | Mixed (urban to rural)       | NR                                                    | 3 (60%)(15, 16, 20)                              |
| School Level                  | Kindergarten/Elementary      | 18 (38.3%)                                            | 2 (40%)(18, 20)                                  |
|                               | Elementary and Middle        | 6 (12.8%)                                             | 1 (20%)(19)                                      |
|                               | Middle                       | 5 (10.6%)                                             | 0                                                |
|                               | High                         | NR                                                    | 0                                                |
|                               | Elementary, Middle, and High | 18 (38.3%)                                            | 1 (20%) (15)                                     |
| Type of Year-Round Calendar   | Single-track                 | 15 (31.9%)                                            | 3 (60.0%)(15, 16, 18)                            |
|                               | Multi-track                  | 8 (17.0%)                                             | 3 (60.0%) (15, 19, 20)                           |
|                               | Both                         | NR                                                    | 1 (33.3%) (15)                                   |
| Participation in Intersession | Mentioned                    | 15 (31.9%)                                            | 1 (20%) (16)                                     |
|                               | Not mentioned                | 24 (51.1%)                                            | 4(83.3%) (15, 18-20)                             |

\*NR = not reported
