# Supplementary material
Source: PubMed Central journal article supplement (PMC6922050)
Supplement: NIHMS1060108-supplement-Appendx_Table_1.pdf [file NIHMS1060108-supplement-Appendx_Table_1.pdf]

**Table 1. Effects of Year-Round Schools: Cooper 2003, Achievement Scores**

| Variable                        |                             | # of Studies | Weighted d-Index<br>(95% CI)* |
|---------------------------------|-----------------------------|--------------|-------------------------------|
| <b>Overall Summary Estimate</b> |                             | <b>39**</b>  | <b>0.06 (0.04 to 0.08)</b>    |
| Track system                    | Single-track                | 15           | 0.19 (0.07 to 0.31)           |
|                                 | Multi-track                 | 8            | 0.04 (-0.12 to 0.2)           |
| SES                             | Low                         | 18           | 0.19 (0.08 to 0.30)           |
|                                 | Moderate, middle, and mixed | 25           | 0.05 (-0.04 to 0.14)          |
| Grade level                     | Elementary                  | 23           | 0.10 ( 0.01 to 0.19)          |
|                                 | Secondary                   | 9            | 0 (-0.14 to .14)              |
| % white                         | <2/3 of sample              | 16           | 0.10 ( -0.02 to 0.22)         |
|                                 | >2/3 of sample              | 14           | 0 (-0.13 to .13)              |
| # years in operation            | 1                           | 8            | 0.03 (-0.13 to .19)           |
|                                 | >1                          | 17           | 0.10 (0 to 0.20)              |
| Intersession                    | Mentioned                   | 15           | .10 (-0.01 to .21)            |
|                                 | Not mentioned               | 24           | .08 (-0.01 to .17)            |
| City size                       | Large urban                 | 12           | 0.07 (-0.06 to 0.20)          |
|                                 | Small urban                 | 6            | -0.03 (-0.21 to 0.15)         |
|                                 | Suburban                    | 6            | 0.13 (-0.06 to 0.32)          |
|                                 | Rural                       | 5            | 0.04 ( -0.19 to 0.27)         |
|                                 | Dissertations and theses    | 26           | 0.09 (0 to 0.18)              |

|                     |                                         |    |                     |
|---------------------|-----------------------------------------|----|---------------------|
| Publication type    | All other                               | 18 | 0.12 (0.02 to 0.22) |
| Outcome measurement | Standardized achievement tests          | 34 | 0.08 ( 0 to 0.16)   |
|                     | Other (effect estimate based on grades) | 8  | 0.09 (-0.06 to .24) |

\*Adjusted for study methodological differences; random error model; \*\* reports of schools from the same school district were combined for one effect estimate
