# Supplementary material
Source: PubMed Central journal article supplement (PMC6922050)

Figure 2. Search Process and Yield

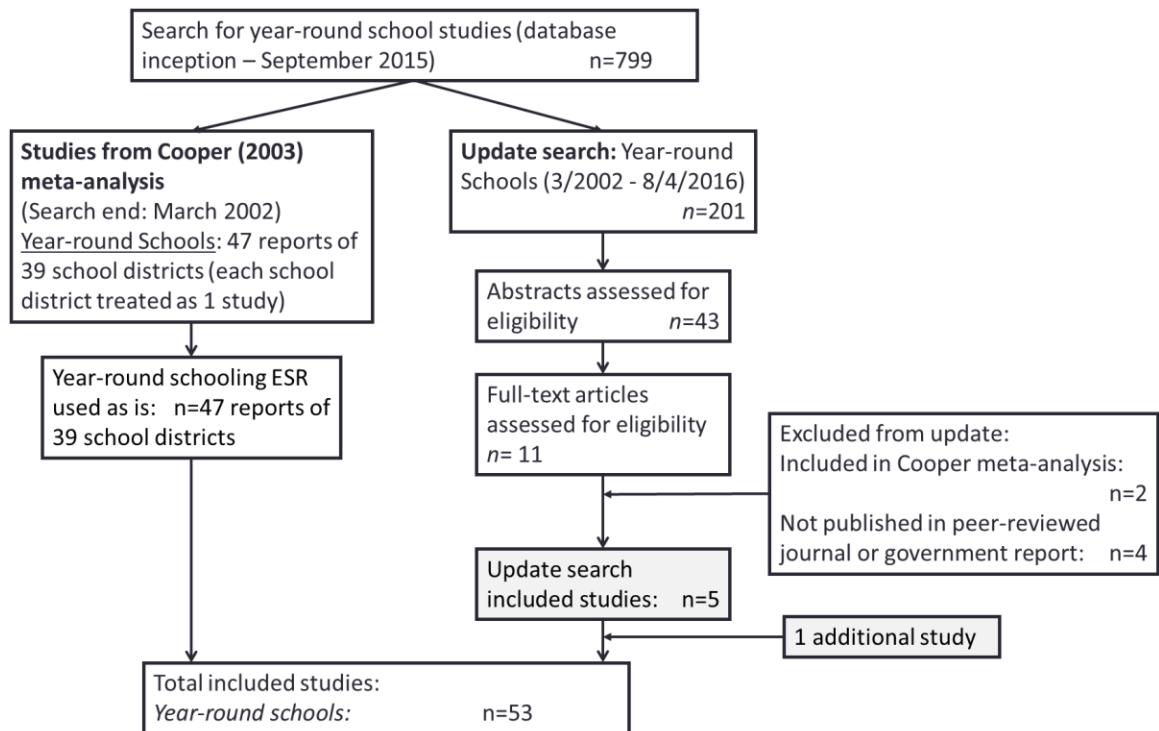

Supplement: NIHMS1060108-supplement-Appendix_Figure_2.pdf [file NIHMS1060108-supplement-Appendix_Figure_2.pdf]
